# Supplementary material for: Sensitivity of Totten Glacier dynamics to sliding parameterizations and ice shelf basal melt rates
Source: Copernicus journal article supplement (doi:10.5194/egusphere-2024-1102), 2024-05-28
Supplement: Supplementary file 1 [file egusphere-2024-1102-supplement.pdf]

# Supplementary

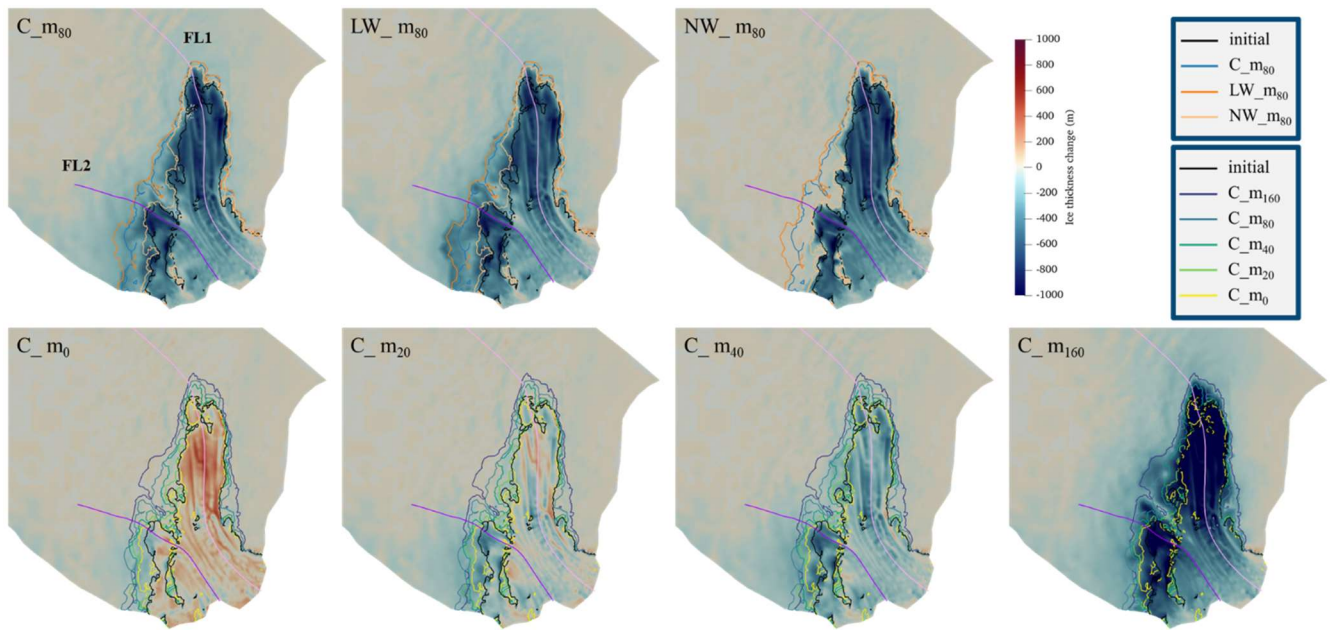

Fig. S1. Ice thickness change from 2015 to 2050 (2050 minus 2015) for different experiments. The black curve represents the initial GL position in the year 2015, and the coloured curve (see legend) represents the GL position in the year 2050 in different experiments.

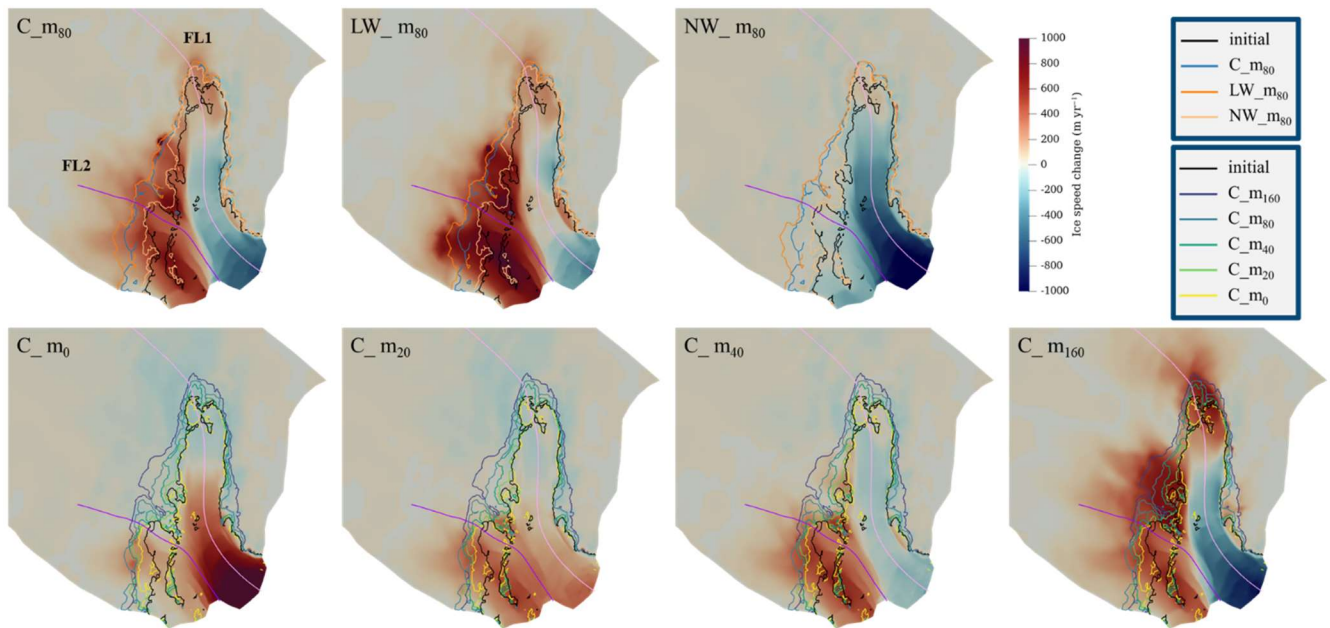

Fig. S2. Surface ice speed change from 2015 to 2050 (speed in 2050 minus speed in 2015) for different experiments. The black curve represents the initial GL position in the year 2015, and the coloured curve (see legend) represents the GL position in the year 2050 in different experiments.
